# Supplementary material
Source: publisher site journal article supplement (https://www.dovepress.com/article/241412)
Supplement: Supplementary file 1 [file get_supplementary_file.php]

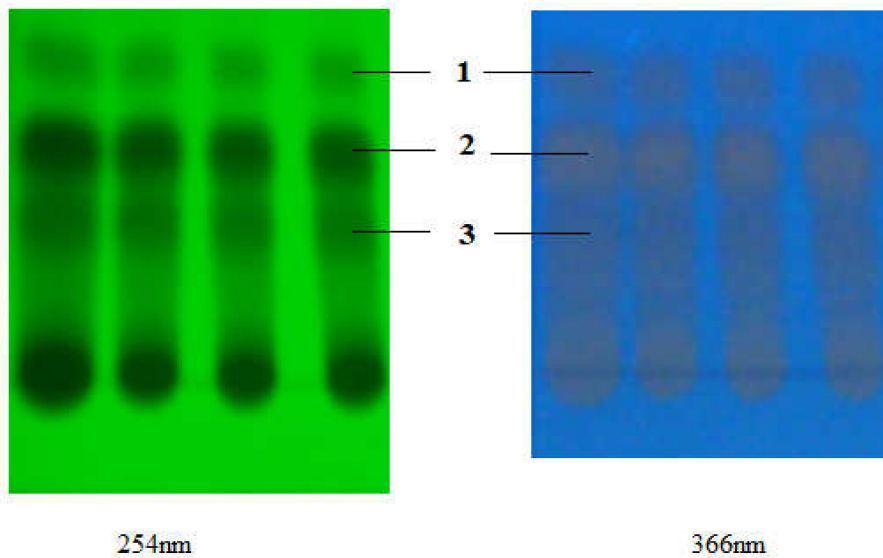

**Figure S1:** TLC bands of major compounds isolated from leaf latex of *A. schelpei* viewed at 254nm and 366 nm.

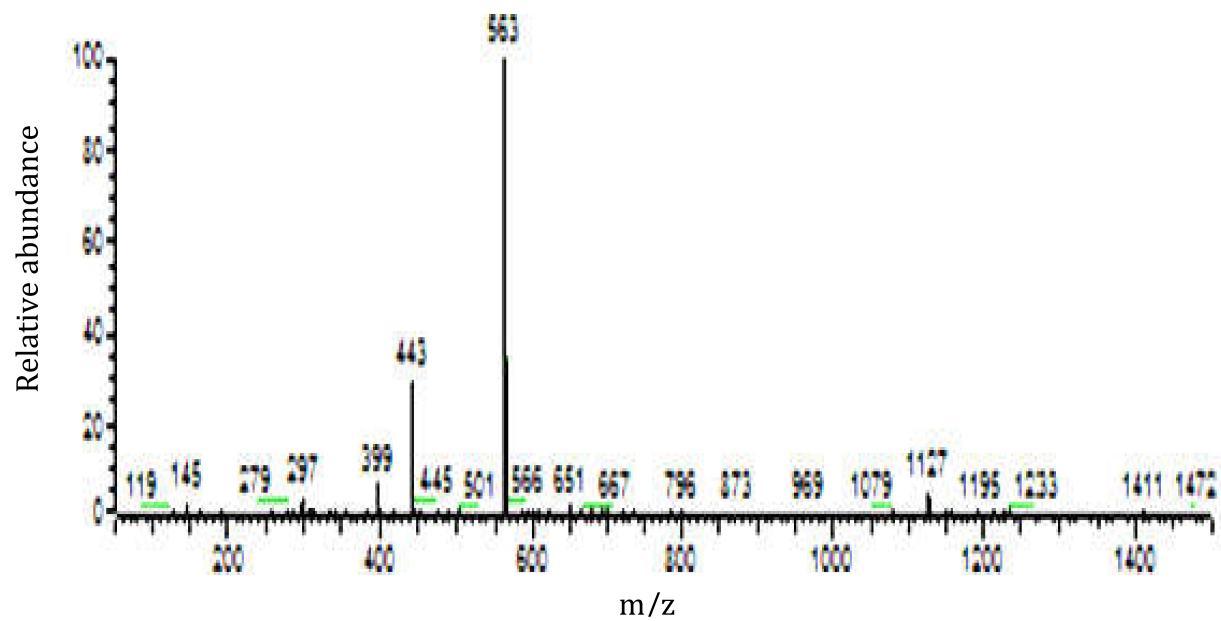

**Figure S2:** Negative-mode ESI-Mass spectrum of microdontin A/B (1)

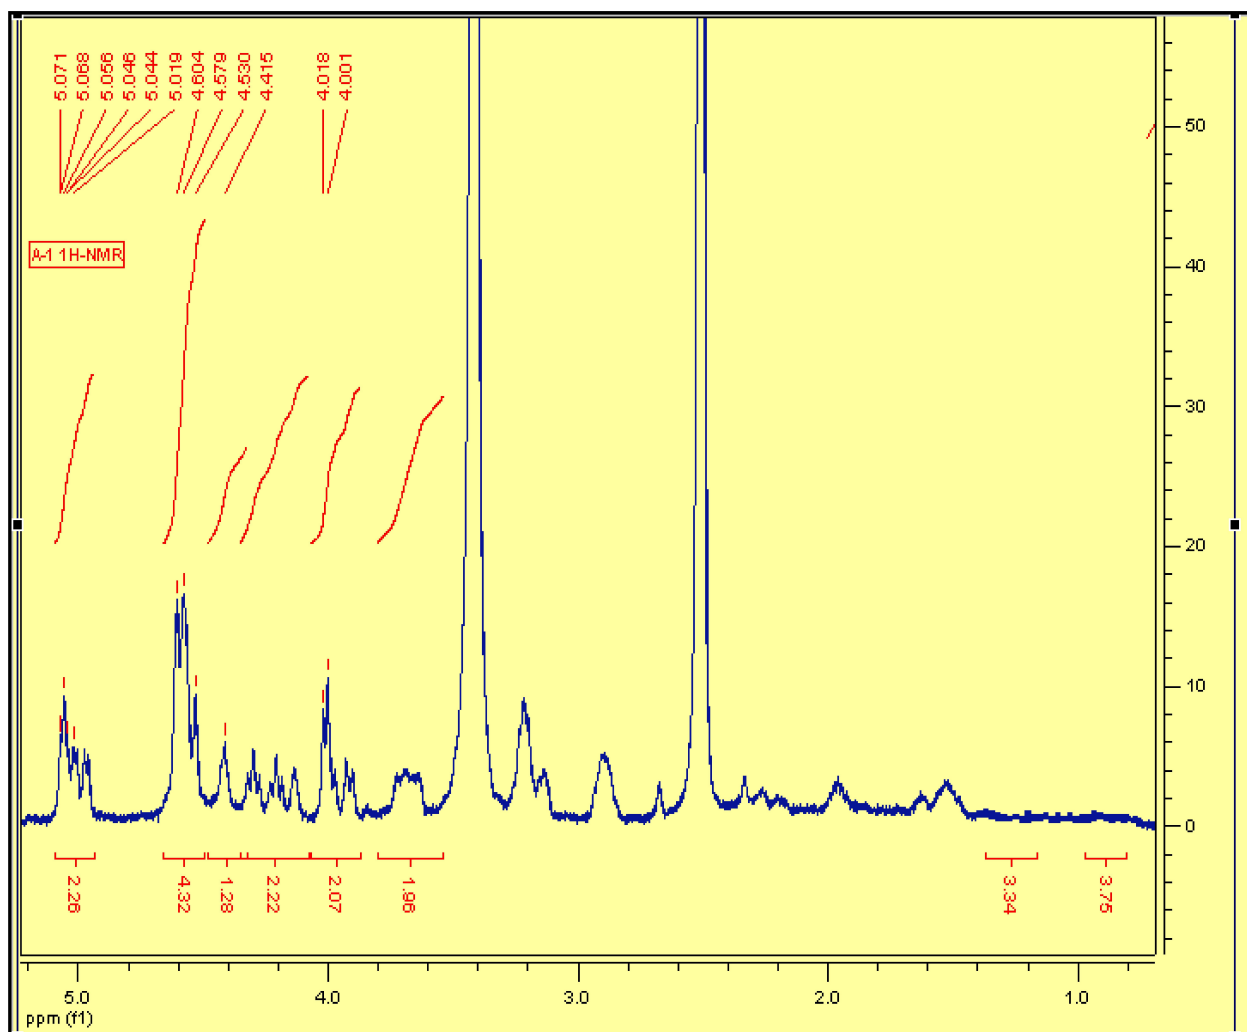

Figure S3: <sup>1</sup>H-NMR spectrum of microdontin A/B (1)

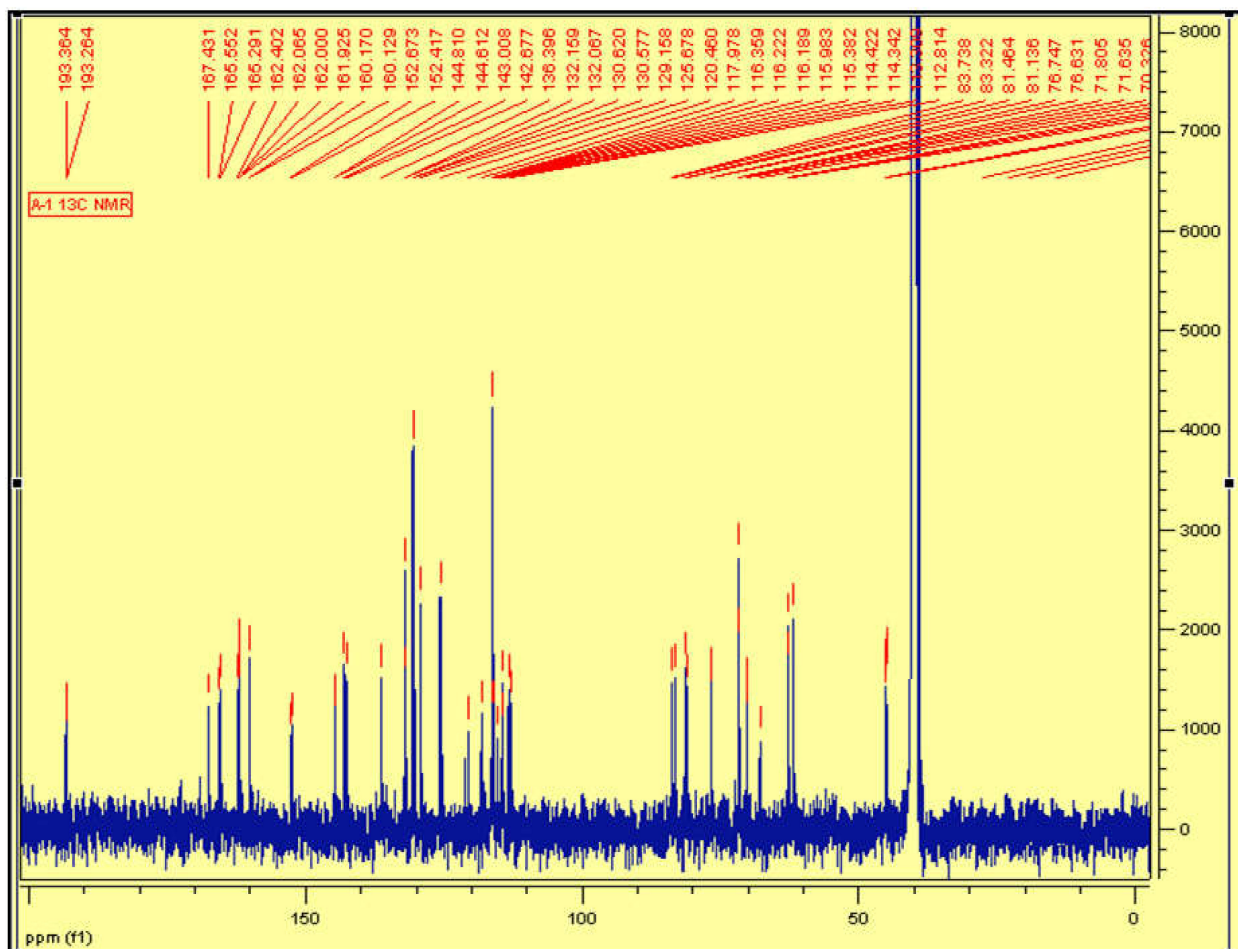

**Figure S4:** <sup>13</sup>C-NMR spectrum of microdontin A/B (1)

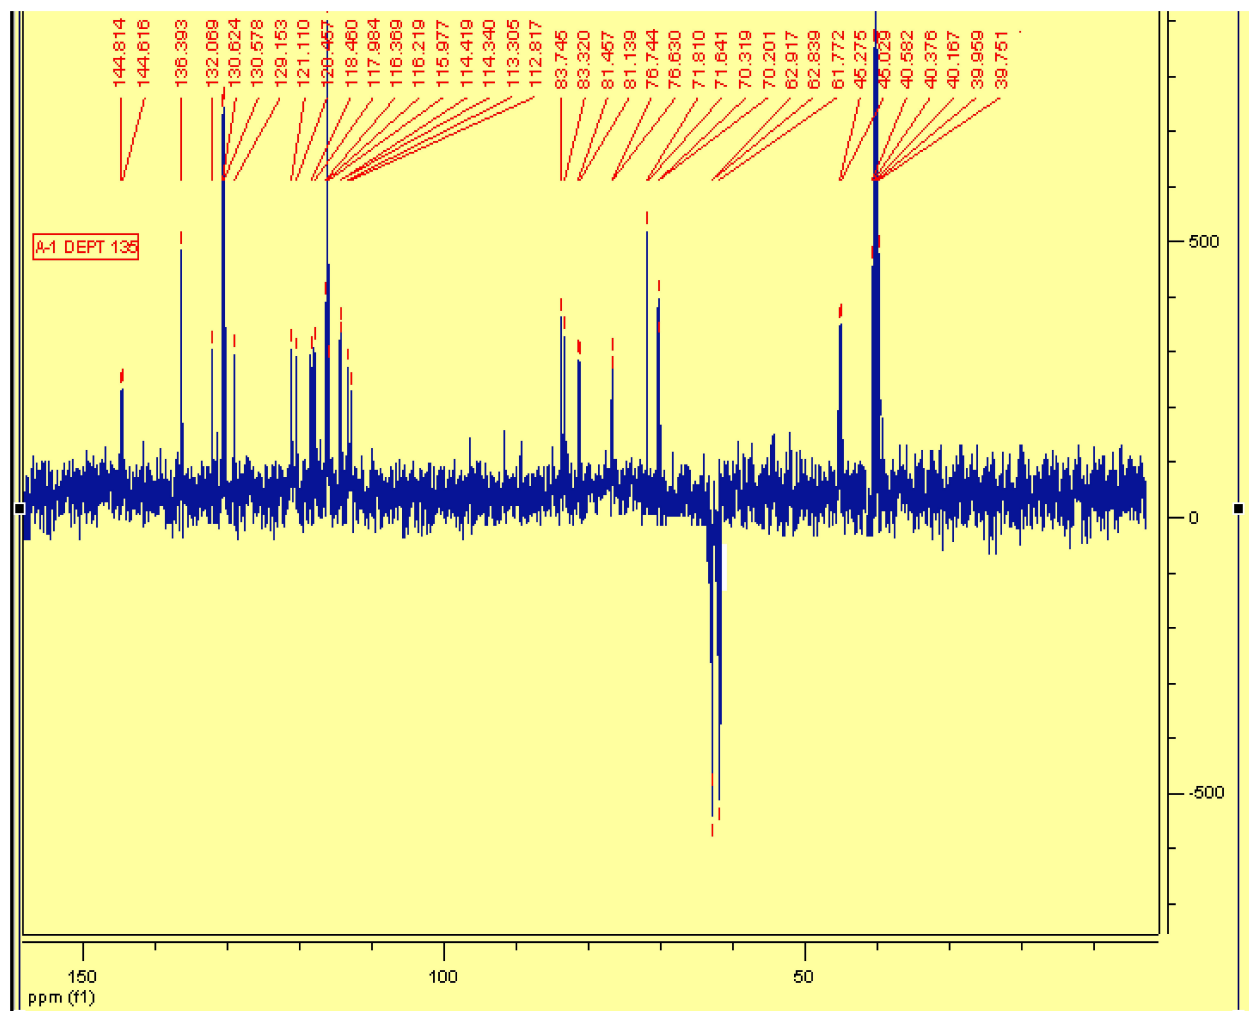

Figure S5: DEPT-135 spectrum of microdontin A/B (1)

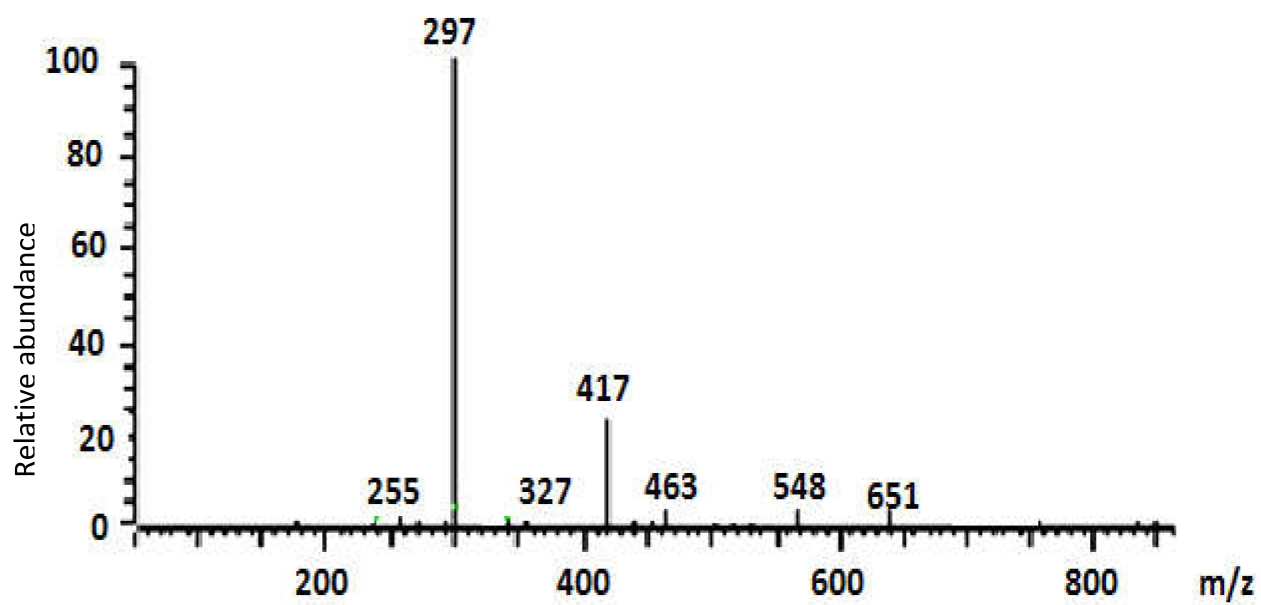

Figure S6: Negative-mode ESI-Mass spectrum of aloin A/B (2)

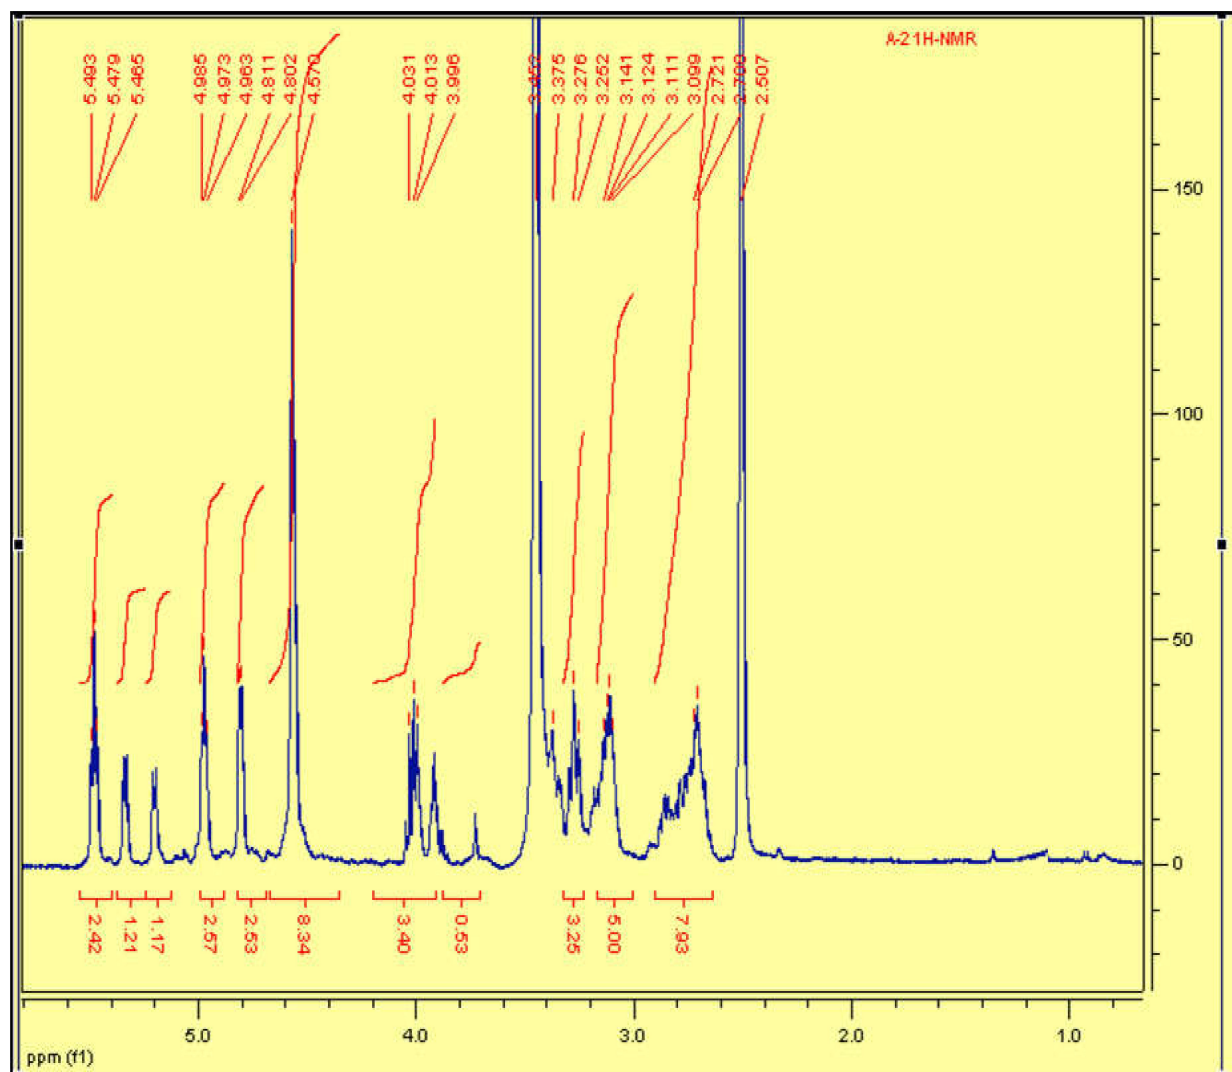

Figure S7: 1H-NMR spectrum of aloin A/B (2)

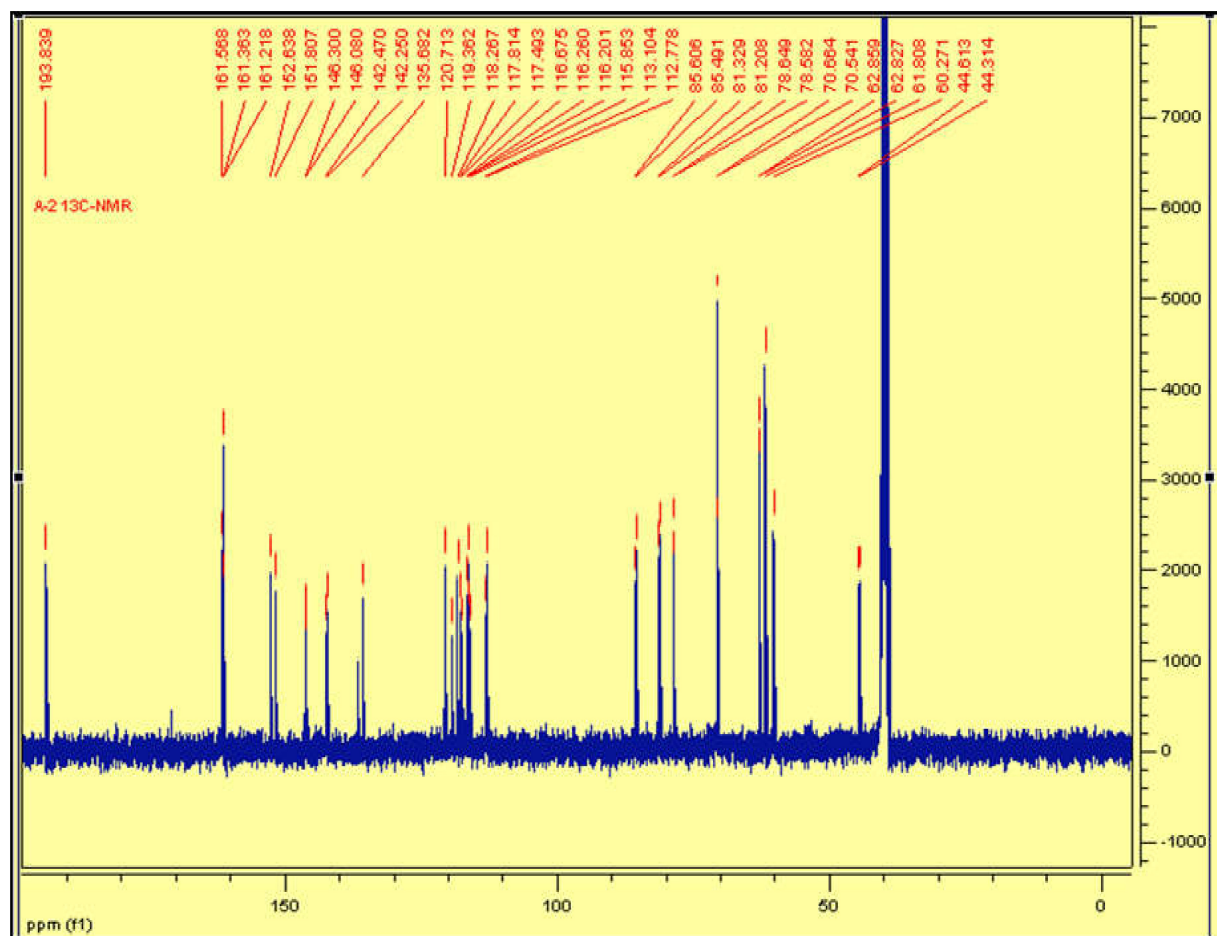

**Figure S8:** 13C-NMR spectrum of aloin A/B (2)



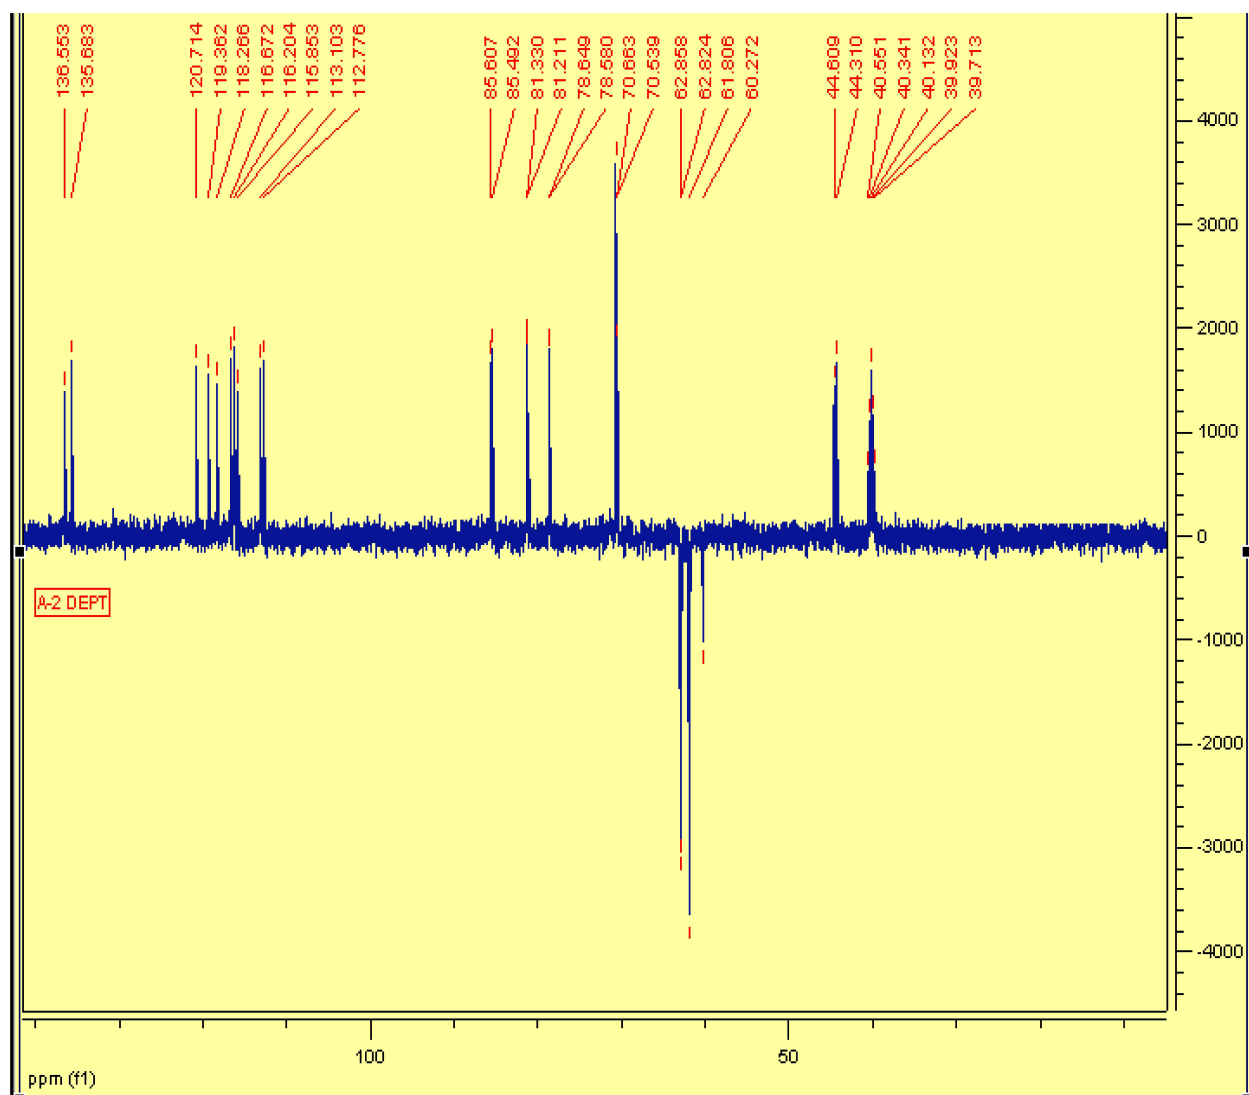

**Figure S9:** DEPT-135 spectrum of aloin A/B (2)

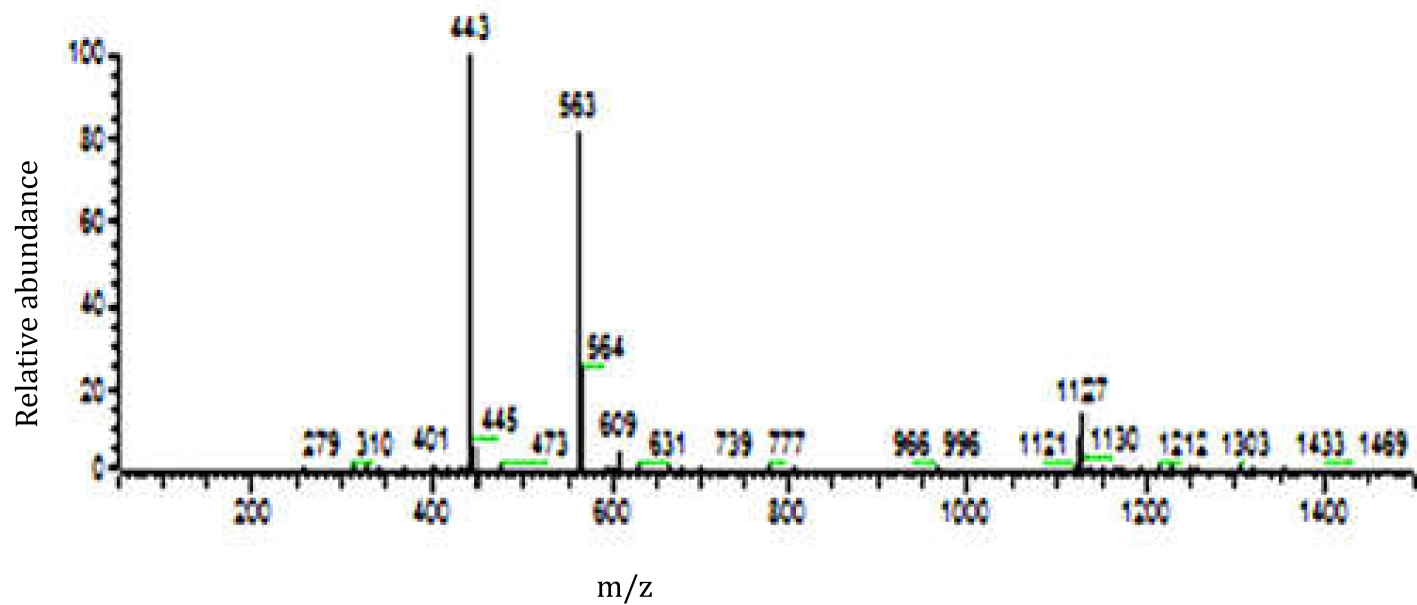

**Figure S10:** Negative-mode ESI-Mass spectrum of aloinoside A/B (3)

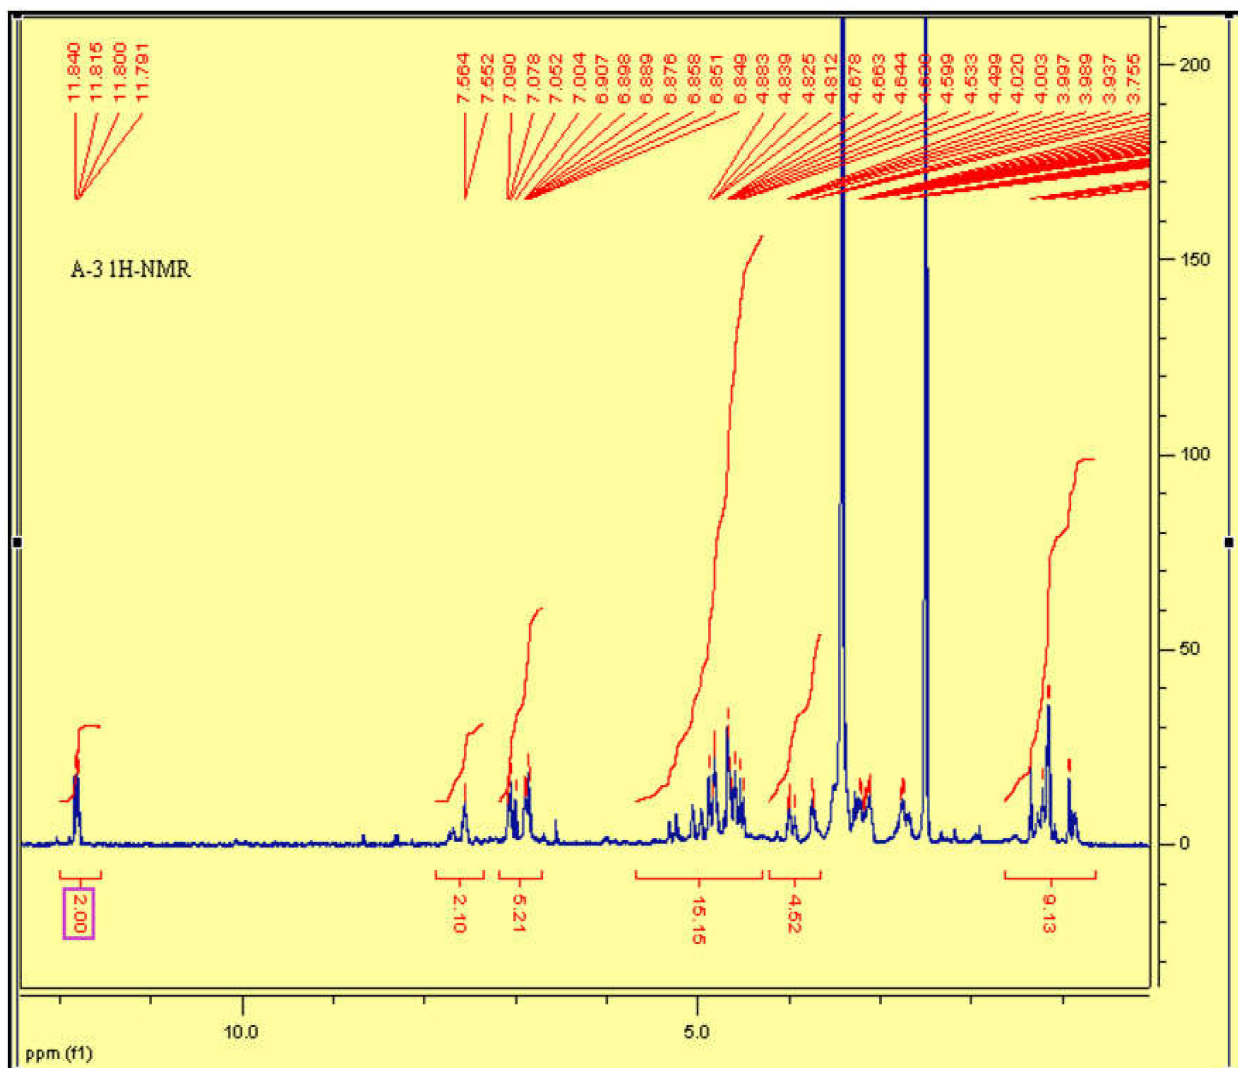

Figure S11: 1H-NMR spectrum of aloinoside A/B (3)

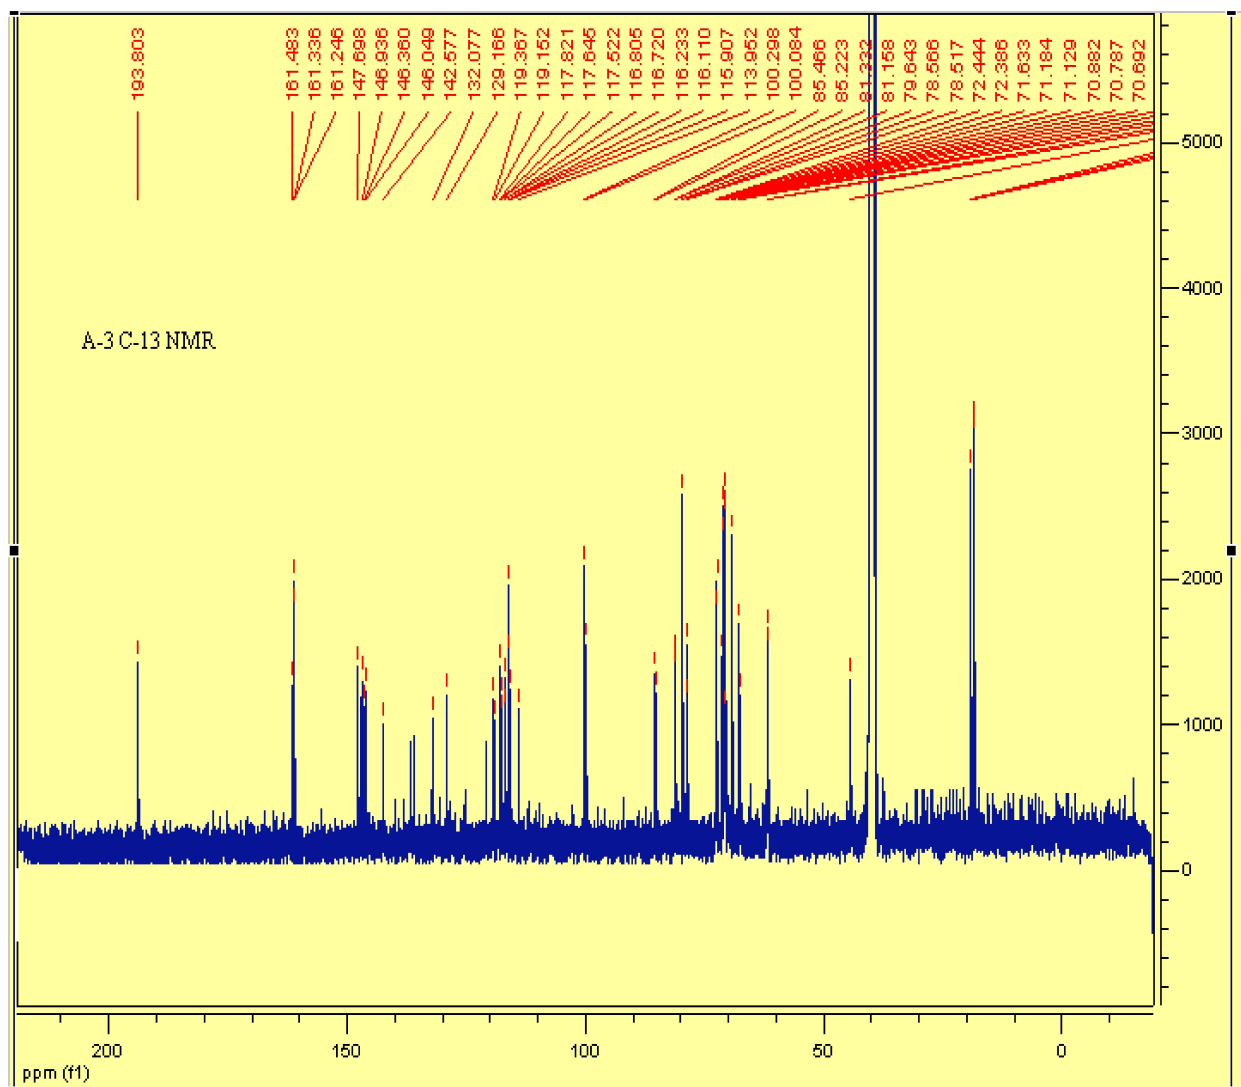

**Figure S12:** <sup>13</sup>C-NMR spectrum of aloinoside A/B (3)

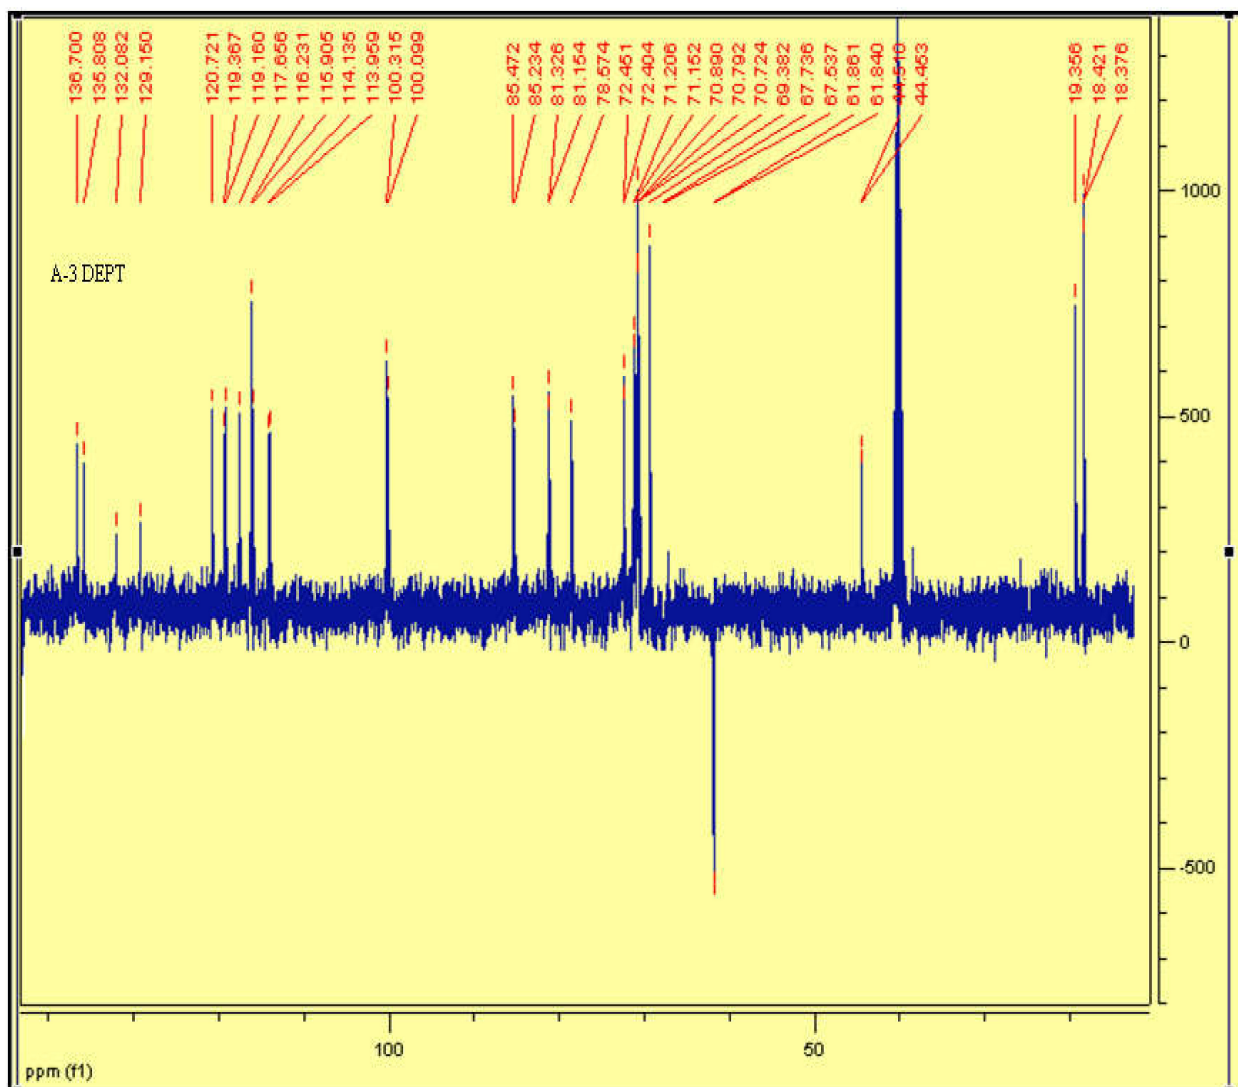

**Figure S13:** DEPT-135 spectrum of aloinoside A/B (3)
